# Supplementary material for: Phosphorylation-Assisted Luciferase Complementation Assay Designed to Monitor Kinase Activity and Kinase-Domain-Mediated Protein–Protein Binding
Source: MDPI journal article supplement (doi:10.3390/ijms241914854), 2023-10-03

## Supplementary Material

### Phosphorylation-assisted Luciferase Complementation assay designed to monitor kinase activity and kinase domain mediated protein-protein binding

Ádám L. Póti, Laura Dénes, Kinga Papp, Csaba Bató, Zoltán Bánóczy, Attila Reményi, Anita Alexa

#### **Figure S1. Results of screening with an academic compound collection**

Summary of five PhALC assay screens with an academic compound collection (RIH compounds: 88 molecules). Red bars show the positive control initial rates (no compound added) while negative control indicates reactions without enzyme or INH corresponds to measurements where a known docking peptide or an inhibitor was added *in trans* in a concentration (200  $\mu$ M) that eliminated docking *in cis*. Error bars indicate SD based on two experiments (N=2). The 96-well plates had the same layout regarding the experimental 88 compounds.

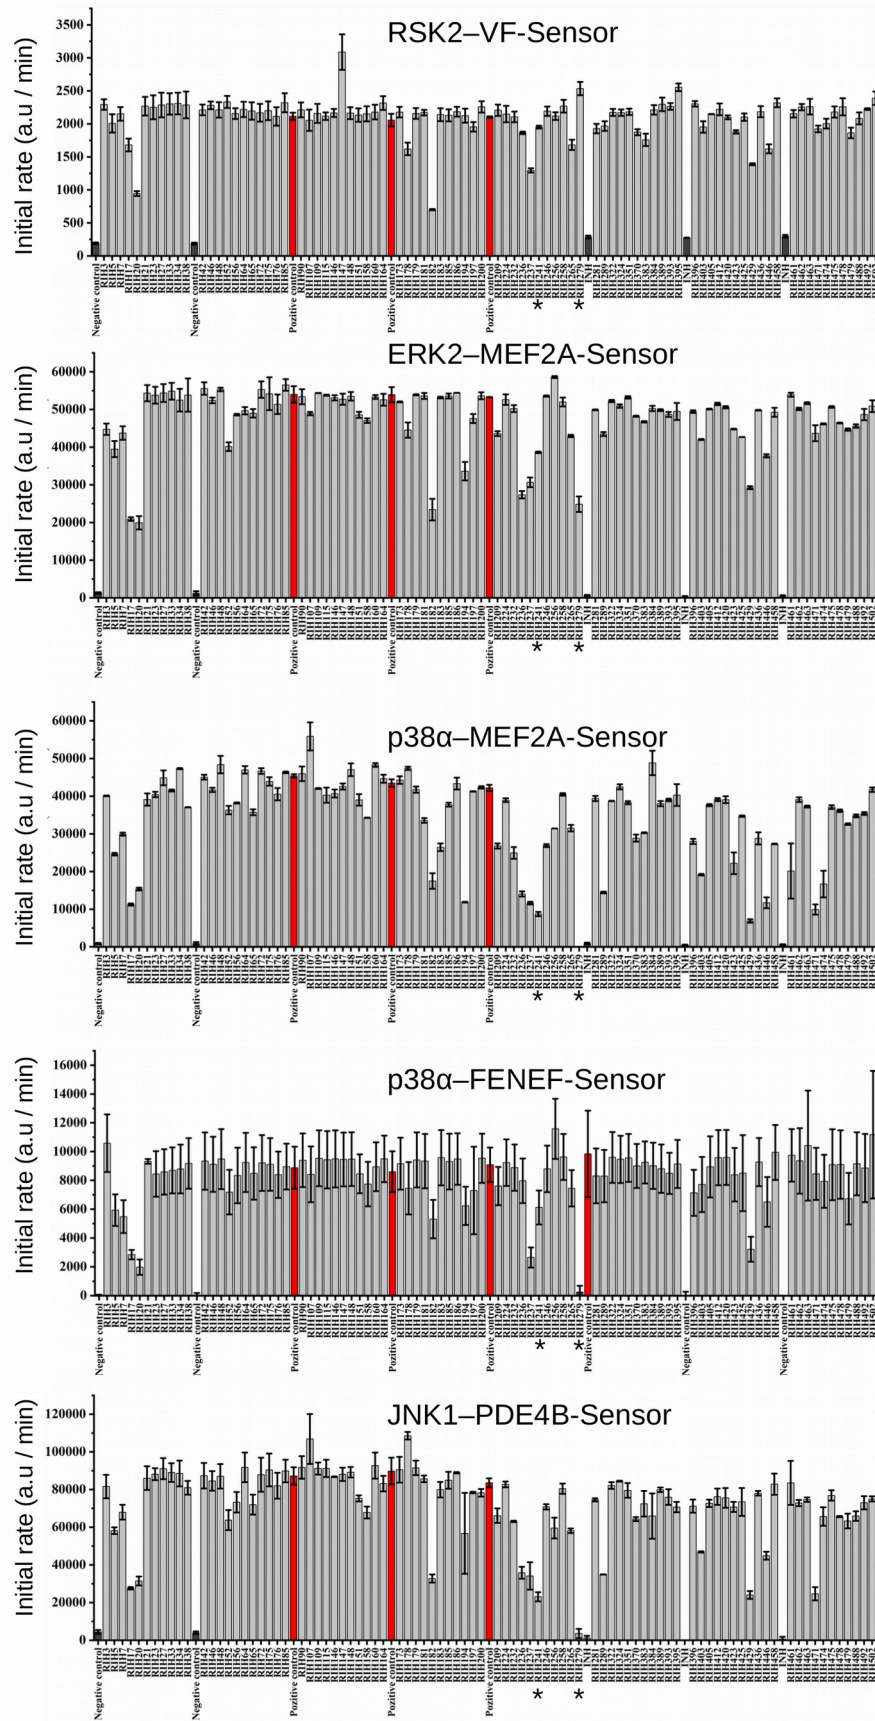

Supplement: s1 [file s1]
